# Supplementary material for: The Pathogenesis of Saffold Virus in AG129 Mice and the Effects of Its Truncated L Protein in the Central Nervous System
Source: Viruses. 2016 Feb 18;8(2):24. doi: 10.3390/v8020024 (PMC4776182; doi:10.3390/v8020024)
Supplement: Supplementary file 1 [file viruses-08-00024-s001.pdf]

# Supplementary Materials: The Pathogenesis of Saffold Virus in AG129 Mice and the Effects of Its Truncated L Protein in the Central Nervous System

Shawn Zheng Kai Tan, Kaw Bing Chua, Yishi Xu and Mookkan Prabakaran

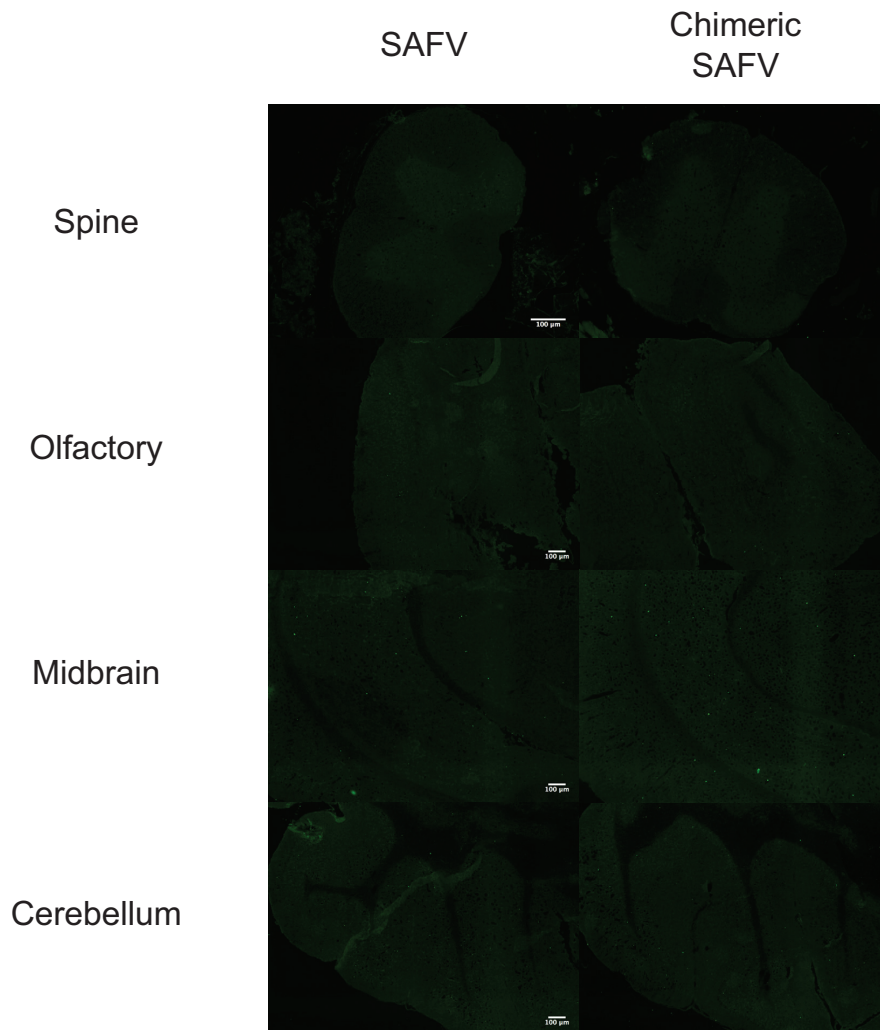

**Figure S1.** Fluorescence images of spine and brain sections of 35 dpi mice that survived infection, stained with anti-VP1 antibodies. No observable staining was detected.

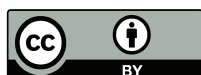

© 2016 by the authors; licensee MDPI, Basel, Switzerland. This article is an open access article distributed under the terms and conditions of the Creative Commons by Attribution (CC-BY) license (<http://creativecommons.org/licenses/by/4.0/>).
